# Supplementary material for: The Effects of Aerobic Exercise on the Recovery of Walking Ability and Neuroplasticity in People with Multiple Sclerosis: A Systematic Review of Animal and Clinical Studies
Source: Hindawi journal article supplement (doi:10.1155/2017/4815958), 2017-01-01
Supplement: f1 [file 4815958.f1.pdf]

## ONLINE SUPPLEMENTS

### a. Search terms used in the systematic search strategy:

The following search terms were used for PubMed and adapted for Embase, Cochrane, Scopus and PEDro to find clinical studies:

#1 (("Multiple Sclerosis"[Mesh]) OR ("multiple sclerosis"[tiab]))

#2 (("Exercise"[Mesh]) OR (aerobic OR exercise OR swim OR swimming OR walk OR walking OR jog OR jogging OR run OR running OR bicycle OR bicycling OR dance OR dancing))

#3 #1 AND #2

#4 (("Nerve Growth Factors"[MeSH Terms]) OR (Brain Derived Neurotrophic Factor OR Nerve Growth Factor))

#5 #3 AND #4

The following search terms were used for PubMed and adapted for Embase, and Scopus to find animal studies:

#1 (Experimental Autoimmune Encephalomyelitis[MeSH Terms])

#2 ("Exercise"[MeSH Terms])

#3 #1 AND #2

- b. Forest plot of comparison for walking ability outcomes between aerobic exercise and wait-list control or non-aerobic exercise from clinical studies:

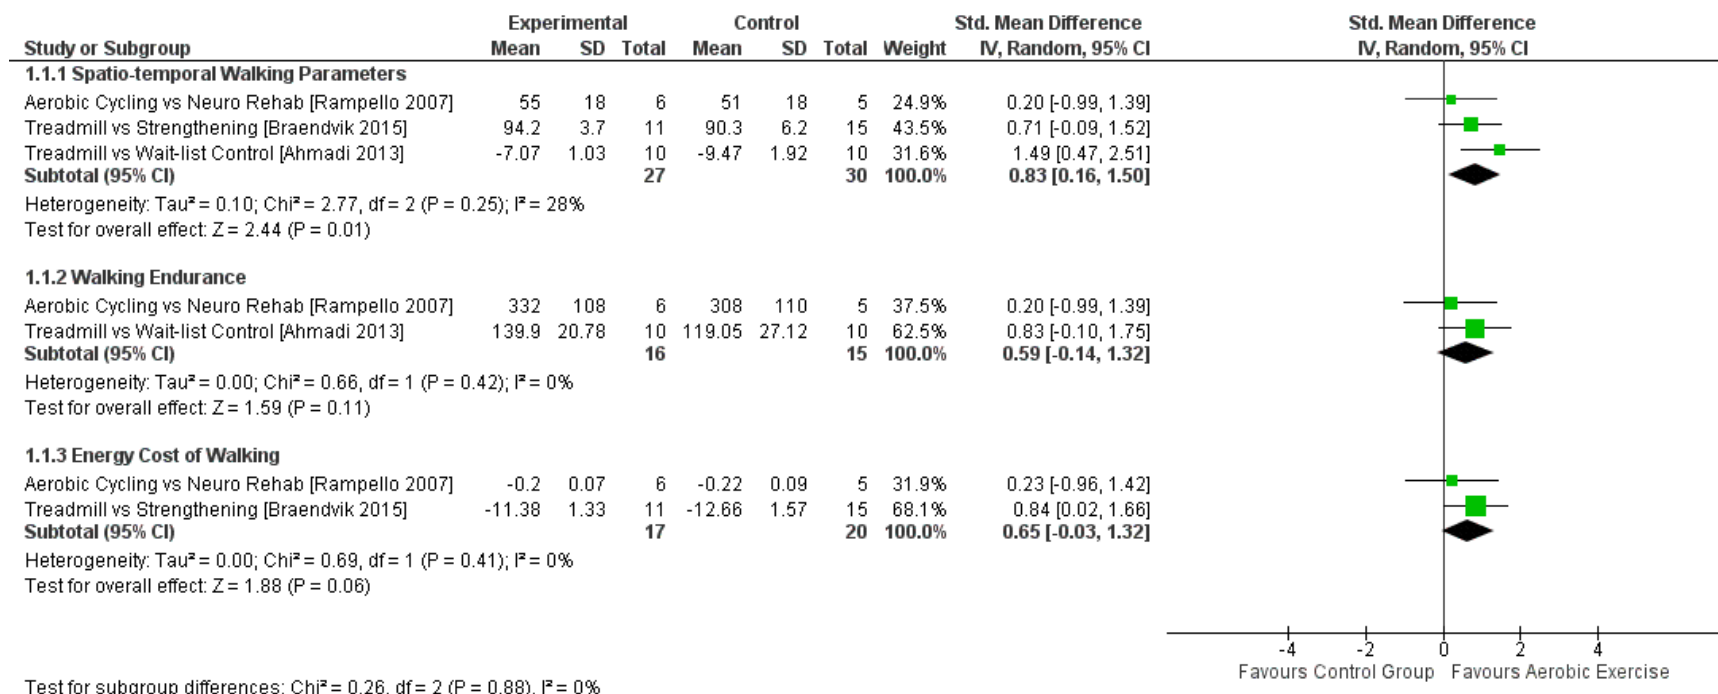

Figure a: Forest plot of comparison for walking ability (spatio-temporal parameters, endurance and energy cost of walking); Risk of Bias categories – A: random sequence generation (selection bias), B: Allocation concealment (selection bias), C: Blinding of participants and personnel (performance bias), D: Blinding of outcome assessment (detection bias), E: Incomplete outcome data (attrition bias), F: Selective reporting (reporting bias), G: Other bias; CI: confidence interval; df: degree of freedom; %: percentage;  $P = p$  value.

c. Table on summary of animal model studies included in this review:

| <b>Selected Trials</b> | <b>Aerobic Intervention<sup>†</sup></b> | <b>Frequency/Intensity/Time</b>                                                                                                                                                                                                                                                                                             | <b>Neuroplastic blood/tissue markers</b>                                                | <b>Disease status/<br/>Gait outcomes</b>                                                                                                                                                                                                       |
|------------------------|-----------------------------------------|-----------------------------------------------------------------------------------------------------------------------------------------------------------------------------------------------------------------------------------------------------------------------------------------------------------------------------|-----------------------------------------------------------------------------------------|------------------------------------------------------------------------------------------------------------------------------------------------------------------------------------------------------------------------------------------------|
| Bernardes et al (49)   | Forced swimming                         | Progressive adaptation in swimming pool: days 1 to 4; followed by progressive load test on day 5; followed by training with intensity set at 60% maximum weight obtained in load test;<br>Before EAE induction: Swimming for 30 min/day, 5 days/week, for 4 weeks; After EAE induction: 10 days' post-induction, 30 min/day | Brain and spinal cord BDNF levels (in pg/mL) in both brain and spinal cord homogenates* | In exercising EAE mice: hind limb paralysis improved*; decreased weight loss*; delayed development of EAE signs*; demyelination in brain and spinal cord*                                                                                      |
| Patel et al (50)       | Forced treadmill running                | Habituation: 5 days, daily treadmill run progressing from 10 to 50 min at 55% maximal oxygen consumption at 0 grade; Training: Rodents ran 60 mins on days 1-2 and 90 mins on days 3 -10 with an increasing intensity starting at 15 m/min for 30 mins then increased to 30 m/min for the remaining time                    | Whole brain concentrations of BDNF (in pg/g), NGF (in pg/g) in exercising EAE rodents*  | No significant difference in clinical disability scores                                                                                                                                                                                        |
| Wens et al (51)        | Treadmill running                       | Habituation: progressive increase in running duration and intensity over 2-week period using short electric shocks, until a running duration of 1 hour and a running speed of 18m/min (25° inclination) was reached; followed by EAE & treadmill running daily for 1 hr/day for 10 consecutive days                         | Serum BDNF (in pg/mL)*                                                                  | Delayed peak disease occurrence in exercising mice*; No difference in peak disease severity between exercising and sedentary mice; The hindquarter paralysis score (1-5 scale) tended to improve (p=0.07) over time in exercising mice with no |

|                   |                                                               |                                                                                                                                                                                                                                                     |                                                                                                                                     |                                                                                     |
|-------------------|---------------------------------------------------------------|-----------------------------------------------------------------------------------------------------------------------------------------------------------------------------------------------------------------------------------------------------|-------------------------------------------------------------------------------------------------------------------------------------|-------------------------------------------------------------------------------------|
|                   |                                                               |                                                                                                                                                                                                                                                     |                                                                                                                                     | difference in the degree of recovery on the last day of experiment                  |
| Klaren et al (52) | voluntary wheel running, forced treadmill exercise, sedentary | Voluntary wheel running (housed in cages with running wheel – 50 days), or forced treadmill exercise (subjected to 5days/week of running on a motorized treadmill (DC5; Jog-aDog, Ottawa Lake, MI) at a 5% grade, 14 m/min, for 30 min for 36 days) | No significant effects of exercise delivered during remission after the initial disease onset levels of hippocampal BDNF (in pg/mg) | No change in clinical disability scores                                             |
| Patel et al (53)  | Forced treadmill running                                      | As described by Patel et al (50)                                                                                                                                                                                                                    | BDNF and NGF concentrations in soleus (in pg/mL)*                                                                                   | No difference in onset of clinical disability, disability ↑ in exercising EAE mice* |

---

†aerobic intervention in the experimental group; \*significant results; &: and; CB1: cannabinoid receptor type 1; EAE: experimental auto-immune encephalomyelitis; BDNF: brain-derived neurotrophic factor; cFOS: a 380 amino acid protein; NR1: subunit of functional NMDA glutamate receptor; CD3+: a type I transmembrane protein found on T cells; Iba1: ionized calcium-binding adapter molecule 1; TNF: tumor necrosis factor; m: meter; min: minute; ET: endurance training; ST: strength training; pg: picogram; mL: milli-litre; mg: milli-gram

---
